# Supplementary material for: Termination codon readthrough of NNAT mRNA regulates calcium-mediated neuronal differentiation
Source: PubMed Central journal article supplement (PMC10506107; doi:10.1016/j.jbc.2023.105184), 2023-08-22

Figure S1

Canonical stop codon

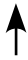

Hs : UGAGGCCCCAGCUCCCAGCCCUGGGCGGCCGUAUCAUCAGGUGCUCUUGCAUCUCGGCCAGCACGGGAGCCAGUG  
Mm : UGAGGCCCCAGCUCCCAGCCCUGGGCGGCCGUAUCAUCAGGUGCUCUUGCAUCUCAGCCAGCACGGGAGCCAGUG  
Ec : UGAGGCCCCAGCCCCAGCCCUGGGCGGCCGUGUACACAGGUGCUCUUGCAUCUCGACCAGCAUGGGAGCCAGUG  
Bt : UGAGGCCCCAGCCCCUCCCCUGGGCGGCCGUGUACACAGGUGCUCUUGGCAUUCACCAGCAUGGGAGCCAGCG  
Ss : UGAGGCUCACAGCCCCAACCCUGGGCGGCCGUGUACACAGGUGCUCUUGGCAAUUCACCAGCAUGGGAGCCAGUG  
Md : UGAGGCCCCAGCCCCAGCCCUGGGCGGCCAUGUACACAGGUGCUCUUGCAUCUCGCCAGCAUGGGAGCCAUUG  
Fc : UGAGGCCCCAACCCCCAGCCCUGGGCGGCCGCGUACACAGGUGCUCUUGGCUUCUCGGCCAGCAUGGGAGCCAGUG  
Mp : UGAGGUCCCAGCCCCAGCCCUGGGCGGCCUUGUACACAGGUGCUCUUGGCUUCUUGGCCAGCAUGGGAGCCAGUG  
Ms : UGAGGCCCCAGCUCCCAGCCCUGGGCGGCCGUGUCAUCAGGUGCUCUUGGCUUCUCGACCAGCAUGGGAGCCAGUG

Hs : CCGCGCAGGAAUGUGGGGUCCCCUGUGUUCUCCUCGCCAGAGGAGCACUUGGCAAGGUCAGUGAGGGGCCAGUAGACC  
Mm : CCGCACAGGAAUGGGGGGUCCCCUGUGUCUCCUCGCCAGAGGAGCACUUGGCAAGGUCAGUGAGGGGCCAGUAGACC  
Ec : CCGCGCAGGAAACGGGGGUCCCCUGUGUCUCCUCGCCAUAGGAGCACUUGCCAAGGUCAGUGAGGGGCCGGUAGGCC  
Bt : CCGCGCAGGAAUGGGGCGUCCCCUGUGCCUCUCGCCAGAGGAGCACUUGCCAAGGUCAGUGAGGGGCGUGUAGGCC  
Ss : CCGCACAGGAAACGGGGCGUCCCCUGUGCCUCUCGCCAGAGGAGCACUUGCCAAGGUCAGUGAGGGGCCUGUAGGCC  
Md : CCGCCCAGGAAUAGGGGGUCCCCUGUGUCUCUCGCCAGAGGAGCAUUGCCAAGGUCAAUGAGGGGCCUGGCAGGCC  
Fc : CCGCGCAGGAAUGGGGGGUCCCCUGUGUCUCUCGCCAGAGGAGCAUUGCCAAGGUCAGUGAGGGGCCGGUAGGCC  
Mp : CCGCGCAGGAAUGGGGGGUCCCCUGUGUCUCUCGCCAGAGGAGCAUUGCCAAGGUCAGUGAGGGGCCUGUAGGCU  
Ms : CCGCGCAGGAAUGGGGGGUCCCCUGUGUUCUCCUCGUCAGAGGAGCACUUGCCAAGGUCAGUGAGGGGCCGGUAGGCC

Hs : CCCGGAGAAGCAGUACCGACAAUGACGAAAGAUACCAGAUCCCUUCCCAACCCCUUUGCACCAGGUCUCCACUAAGGGGC  
Mm : CCUGGAGAAGCAGUACCGACAAUGACGAAAGAUACCAGAUCCCUUCCCAACCCCUUUGCACCAGUCCACCAAGGGGC  
Ec : CCCGGAGAAGCAGCACCGACAAUGAUGACAAUACCAGAAACUUUCCAAACCCCUUGCACCAGUCCACUAGCCAGGC  
Bt : CCUGGAGAAGCAGCACCGACAAUGACGACAAACAAGAGAUCCCUUCCCAACCCCUUGCACCACUCCACUGCGGGUG  
Ss : CCCAGAGAAGCAGCACCGACAAUGACGACAAUACCAGAUUCCCUUCCCAACCCCUUUGCACCACUCCUGCUGCCGGUG  
Md : UCCAGAGAAGCAGCACCGCAAUGACGACAAUACCAGAUCCCUUCCAAUCCCUUGUGUACCCCUCCAUUAUGGGGCG  
Fc : CCCGGAGAAGCAGCACCGACAAUGACGACAAUACCAGAUCCCUUCCAAACCCCUUUGCGCCCCUCUGACCACUUGGGU  
Mp : CCUGGAGAAGCAGCACCGACAAUGACGACAAUACCAGAUCCCUUCCAAAGCCCUUUGCACCACUCCUGACCACUUGGGU  
Ms : CCCAGAAAAGCAGCACCGACAAUGAUGAAGAUACAGUCCCUUCCCAAGCCCUUUGCCCCUGUCCACUACCGGCG

Hs : AGGGUCGAGAGAGGAGGGGGGAUAGGGGGAGCAGACCCCUAGAGAUCUGGGC  
Mm : AGGGUCGGGAGAGGAGGGGGGAUAGGGGGAGCAGACCCCUAGAGAUUUGGGC  
Ec : GGGGUAGAGGGAGGAGGGGGUUGGGGGAGCAGACCCCUAGAGAUCUGGGC  
Bt : GCCUAGAGGGAGGAACGGGGCUAGGGGGAGCAGACUCCUAGAGAUCUGGGC  
Ss : GCAUAGAGGGAGGAGGGGGAAUGGAGGGAGCAGACCCCUAGAGAUCUGGGC  
Md : GGGUAGAGGGAGGAGGGGAUUGGAGGGAGAAUUCUGAGAUUUGGGCAUAGGCA  
Fc : GGGGUAGAGGGAGGAGGGGGUUGGGGGAGCAGACCCCGAGAUUCUGGGCA  
Mp : GGGGUAGAGGGAGGAGGGGGUUGGGGGAGCAGUACCCCAAGAUUCUGGG  
Ms : GGUGGGAGAGGAGGGGGAAAGAGGGGAGCAACCCUCGAGAUUUGGGCGUAG

Figure S2

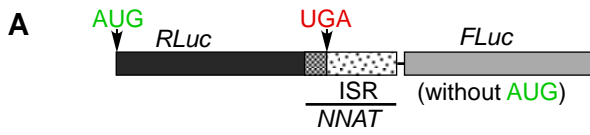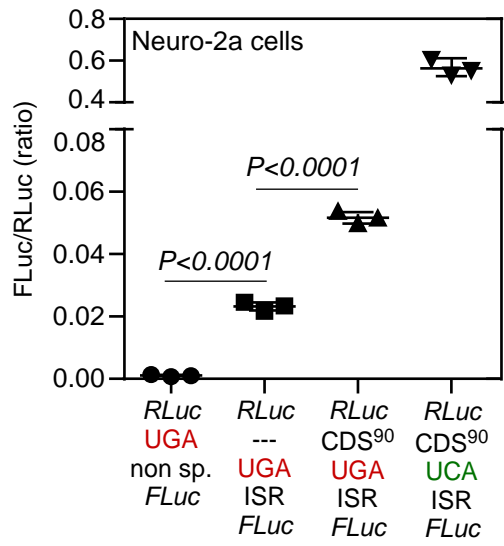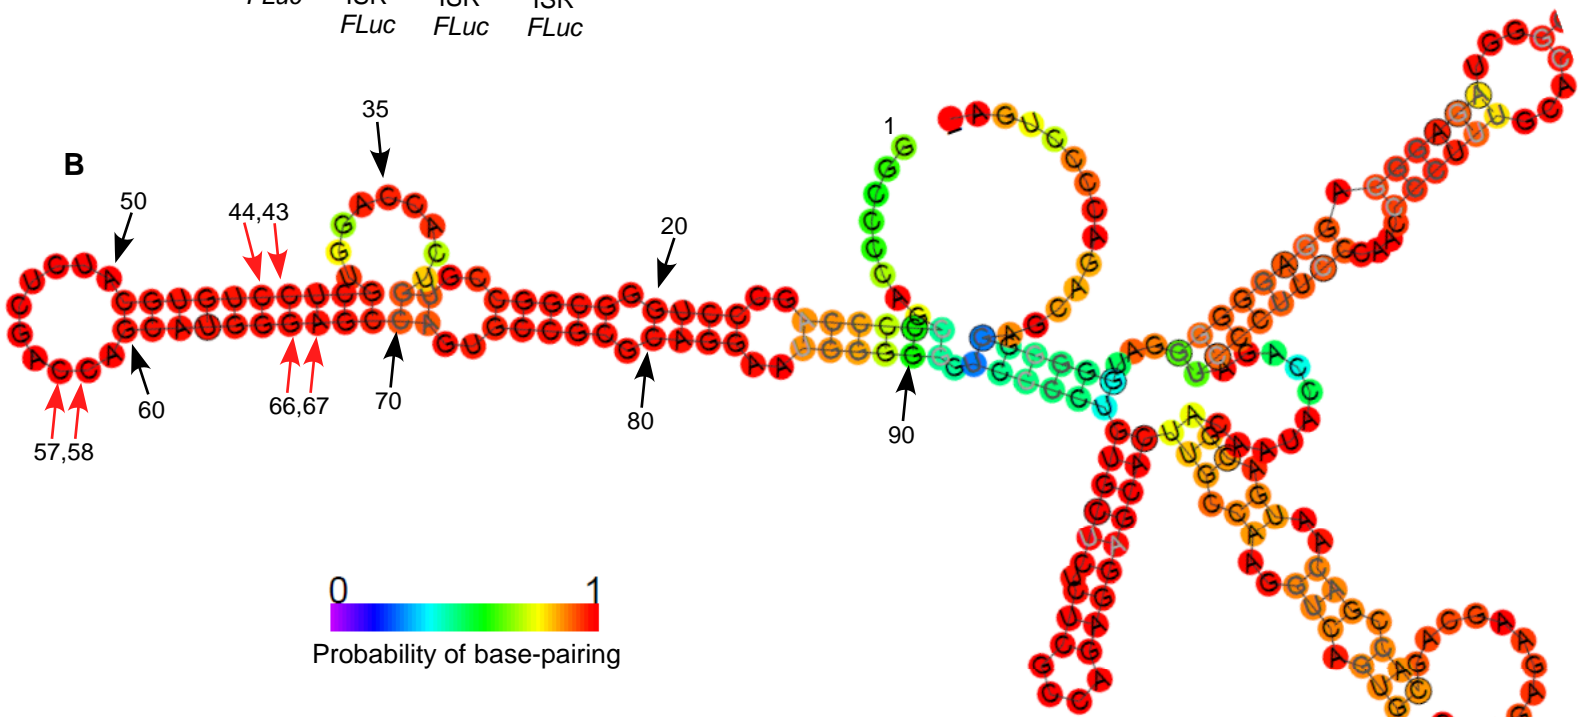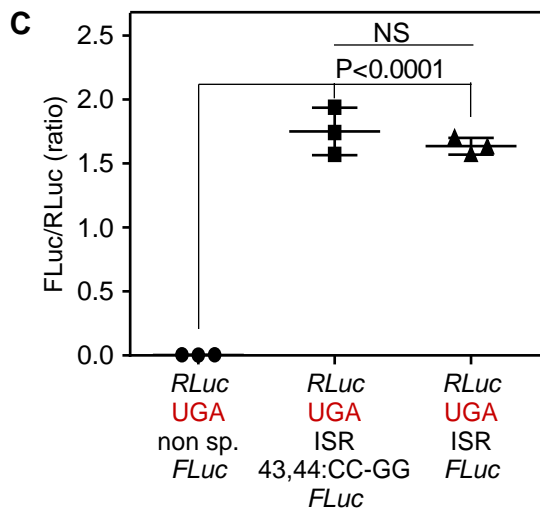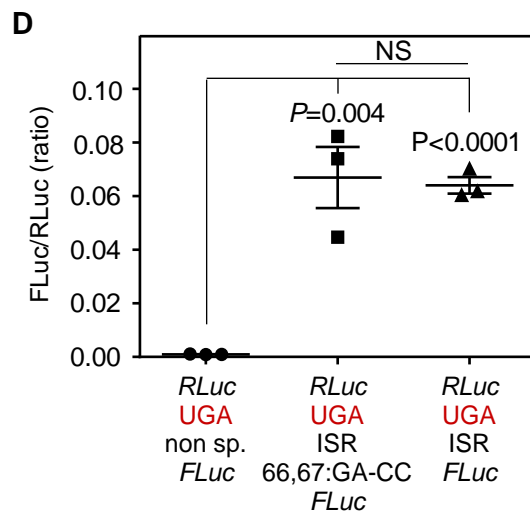

**Figure S3**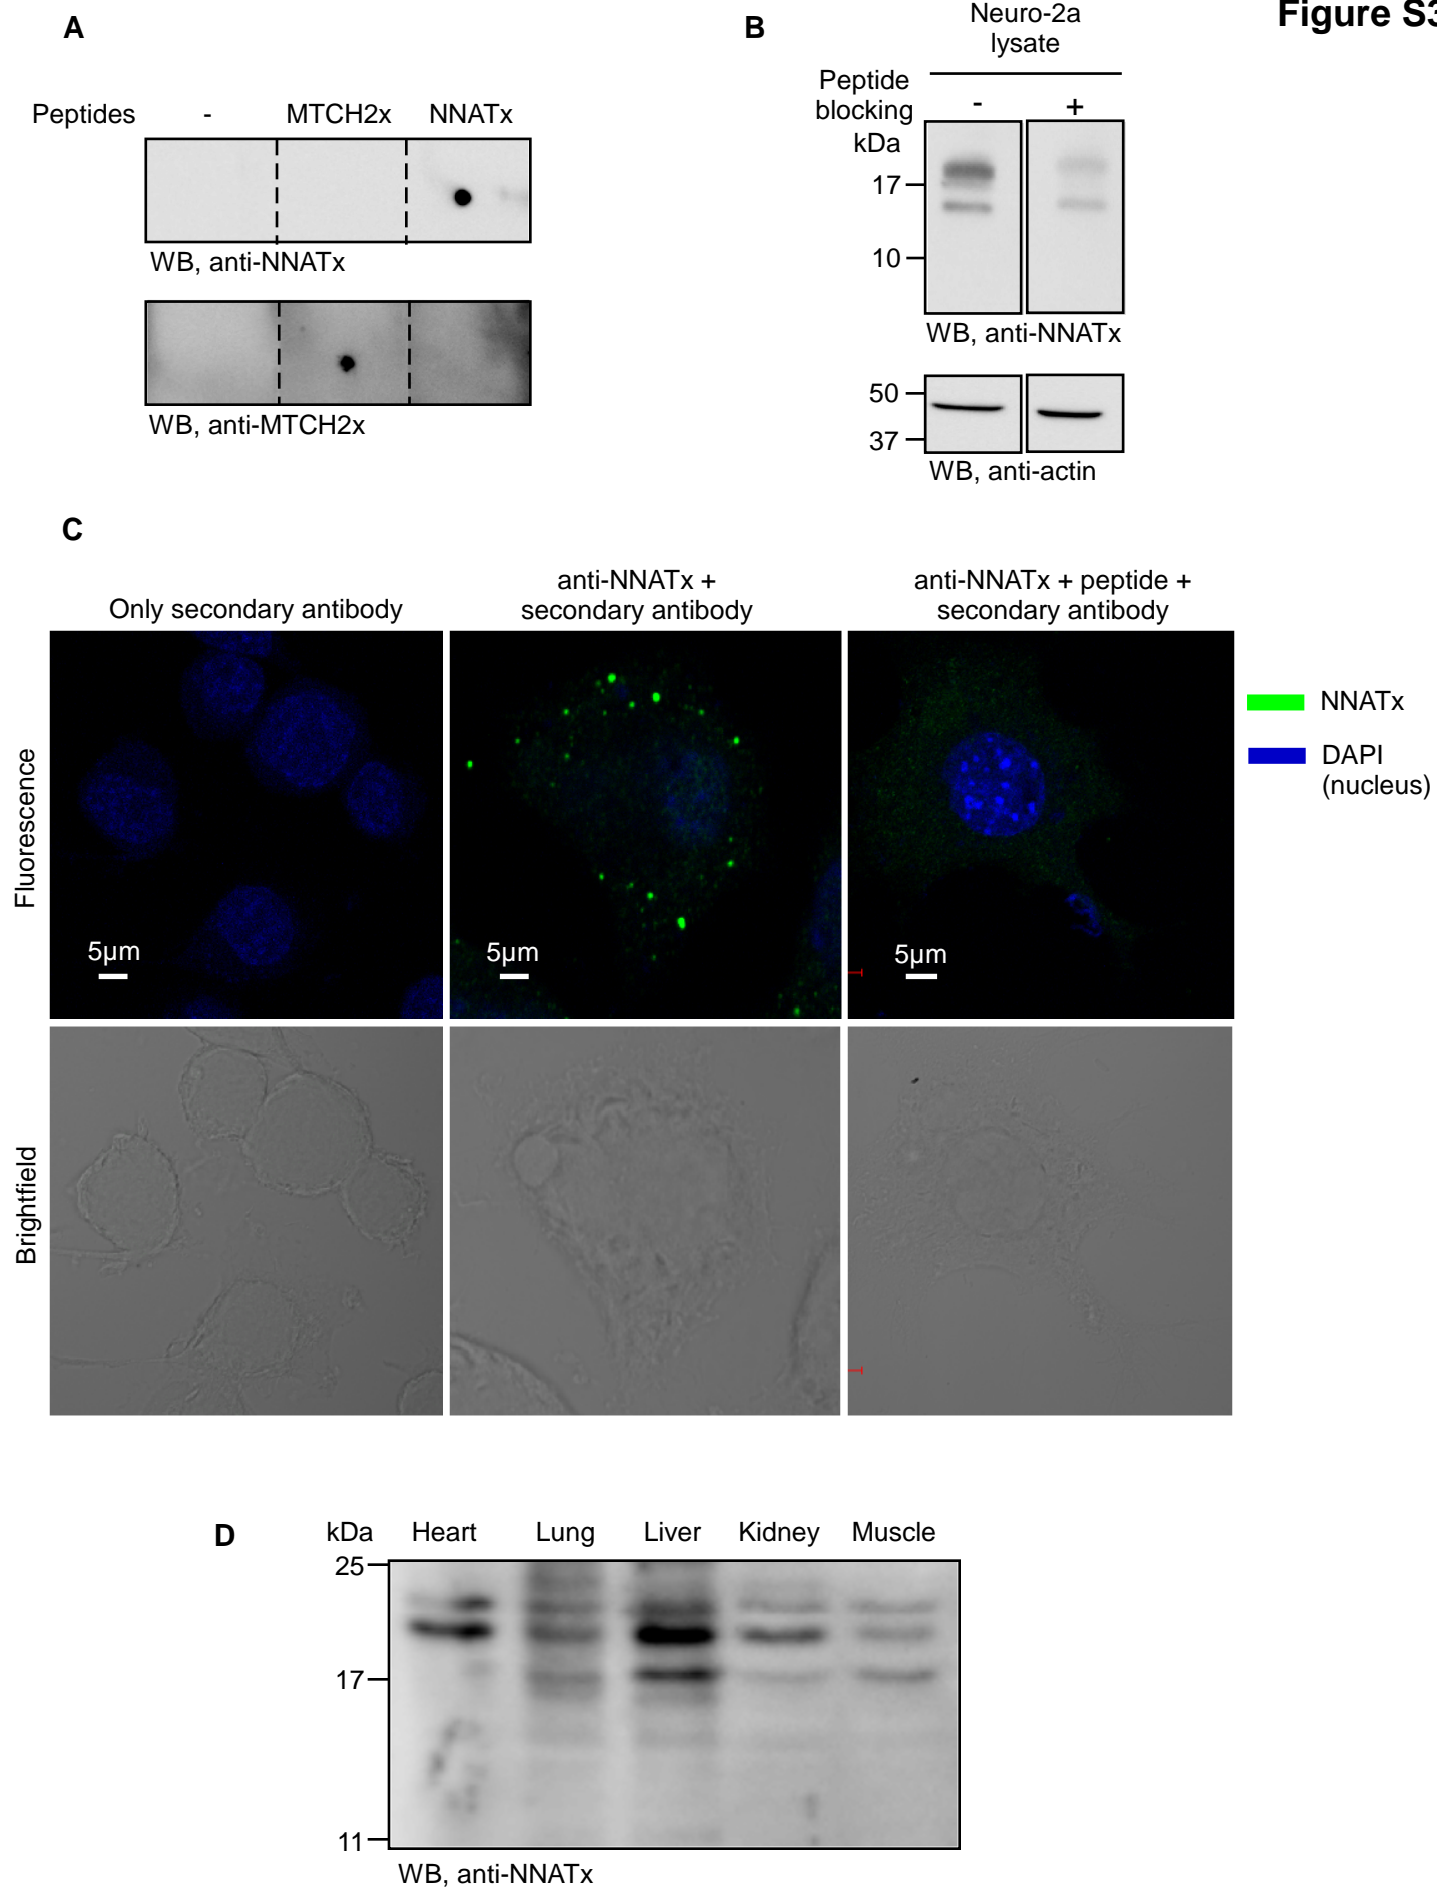

**Figure S4**

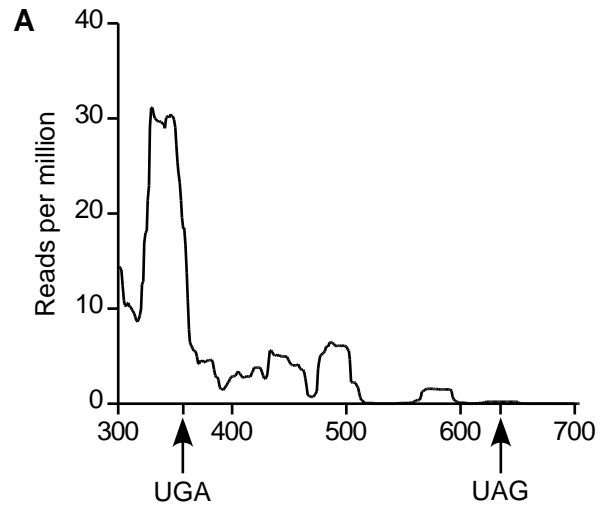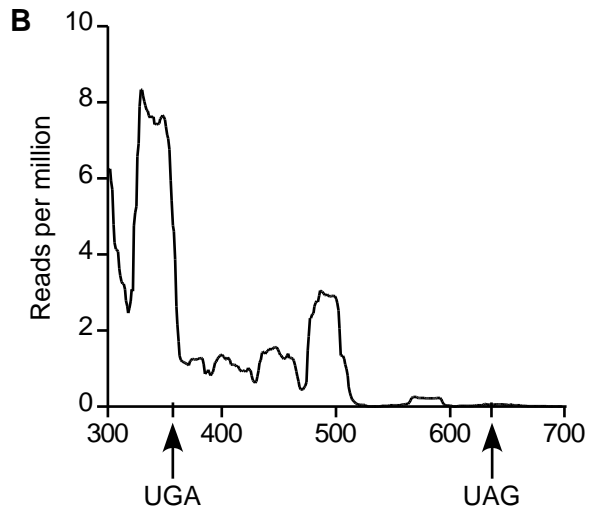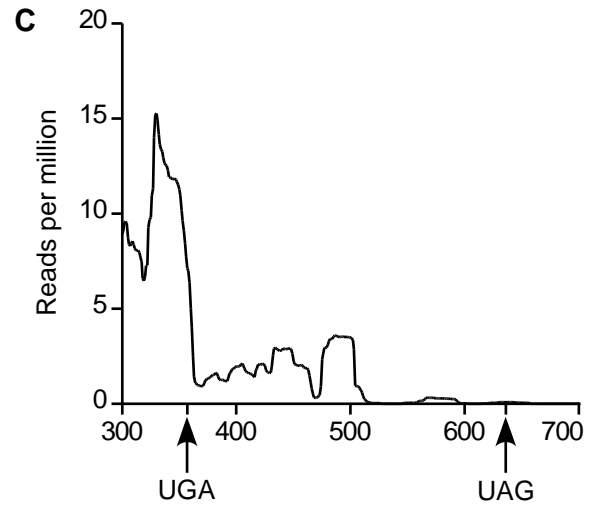

**Figure S5**

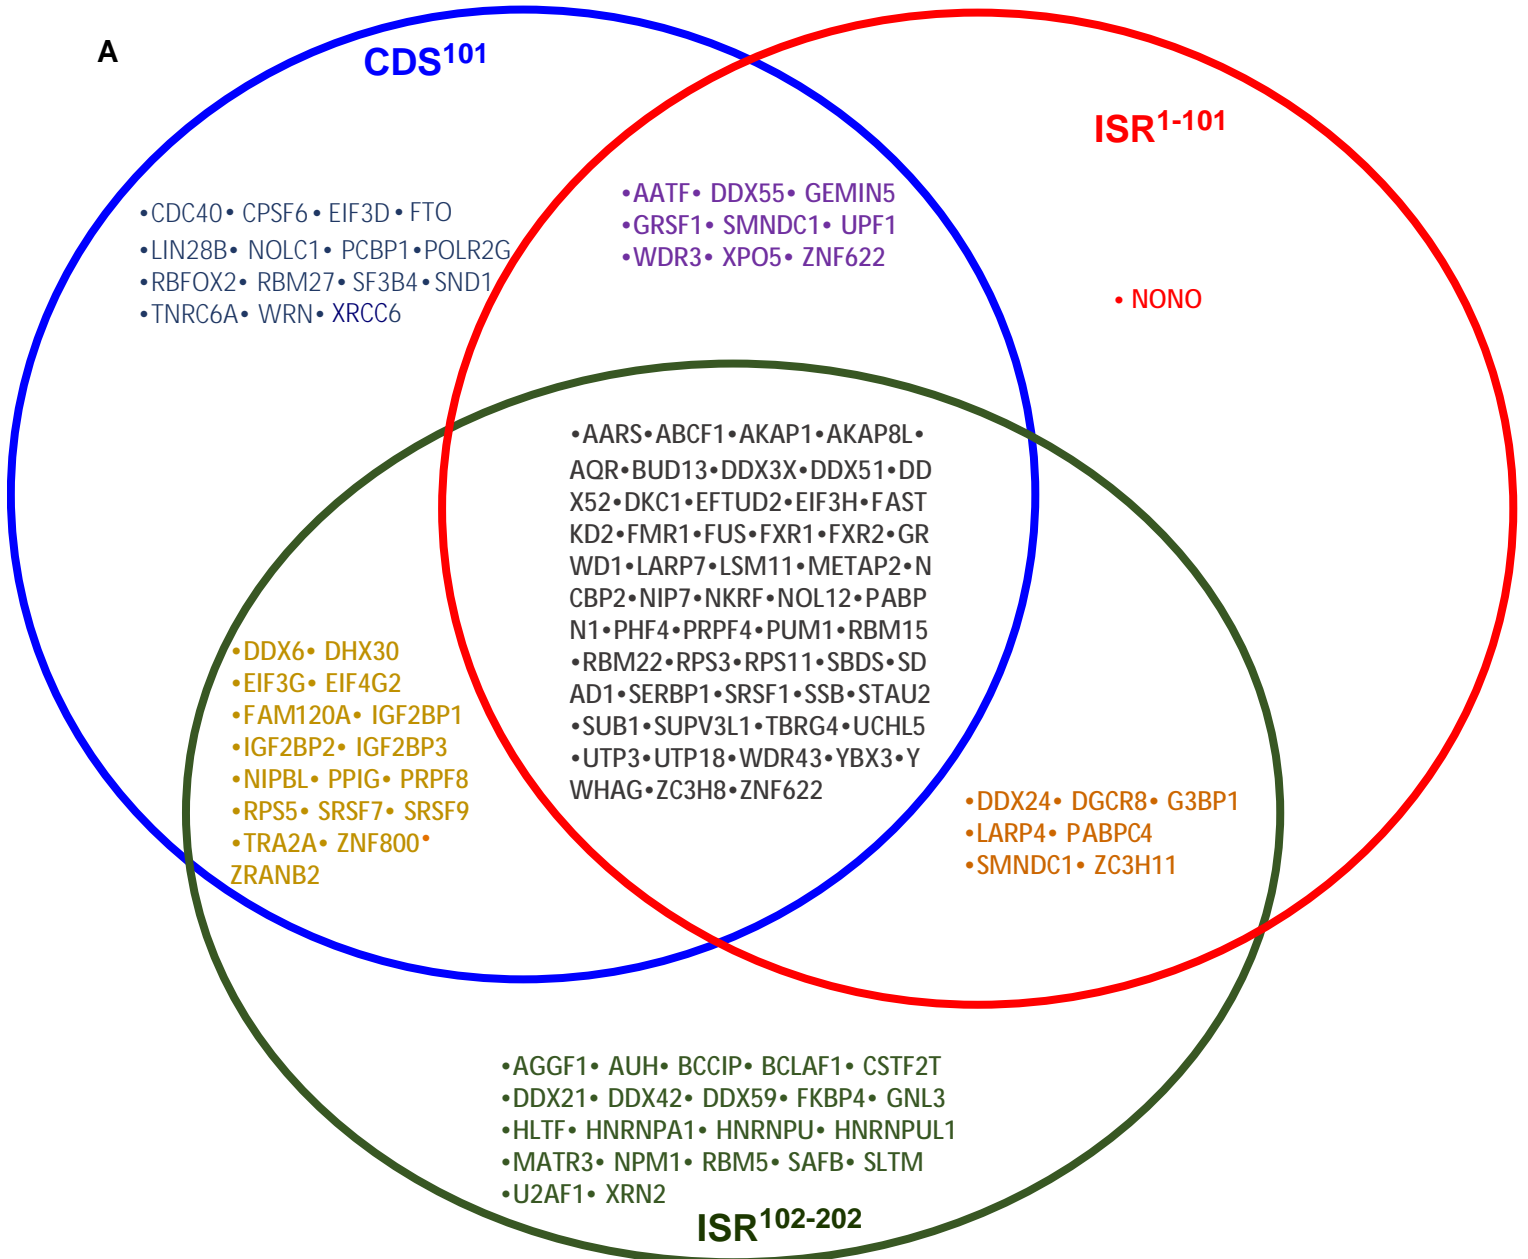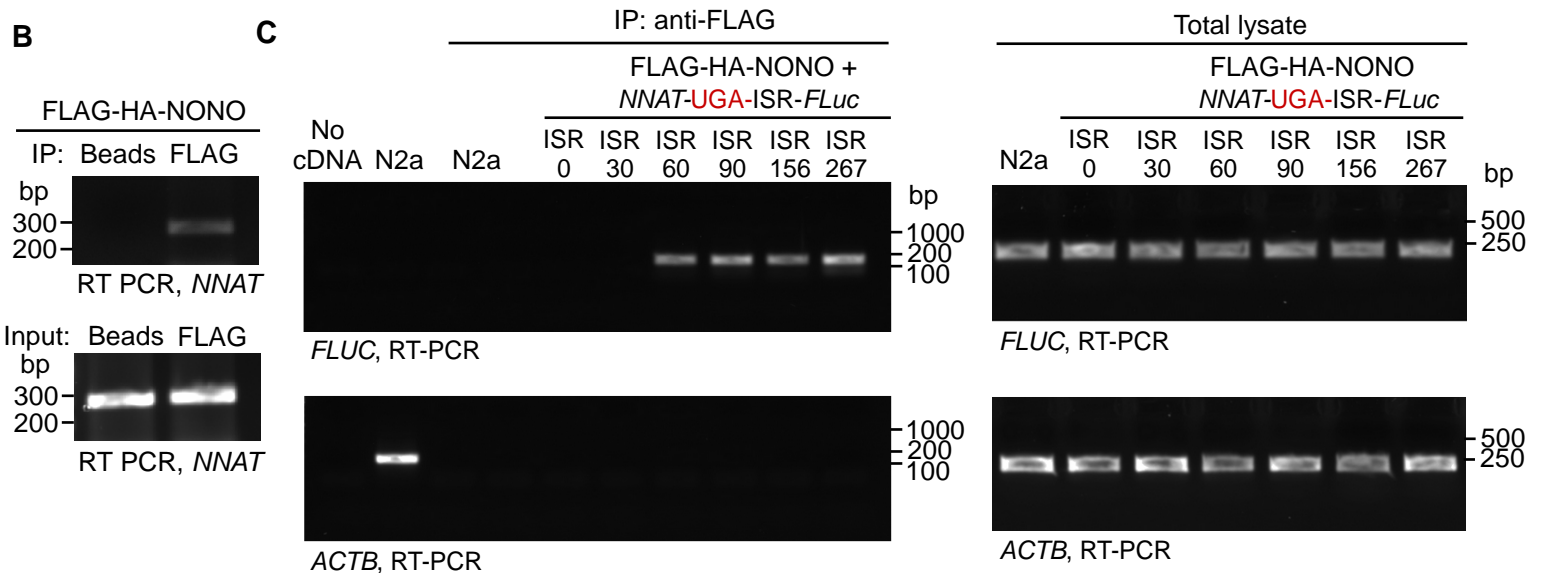

**Figure S6**

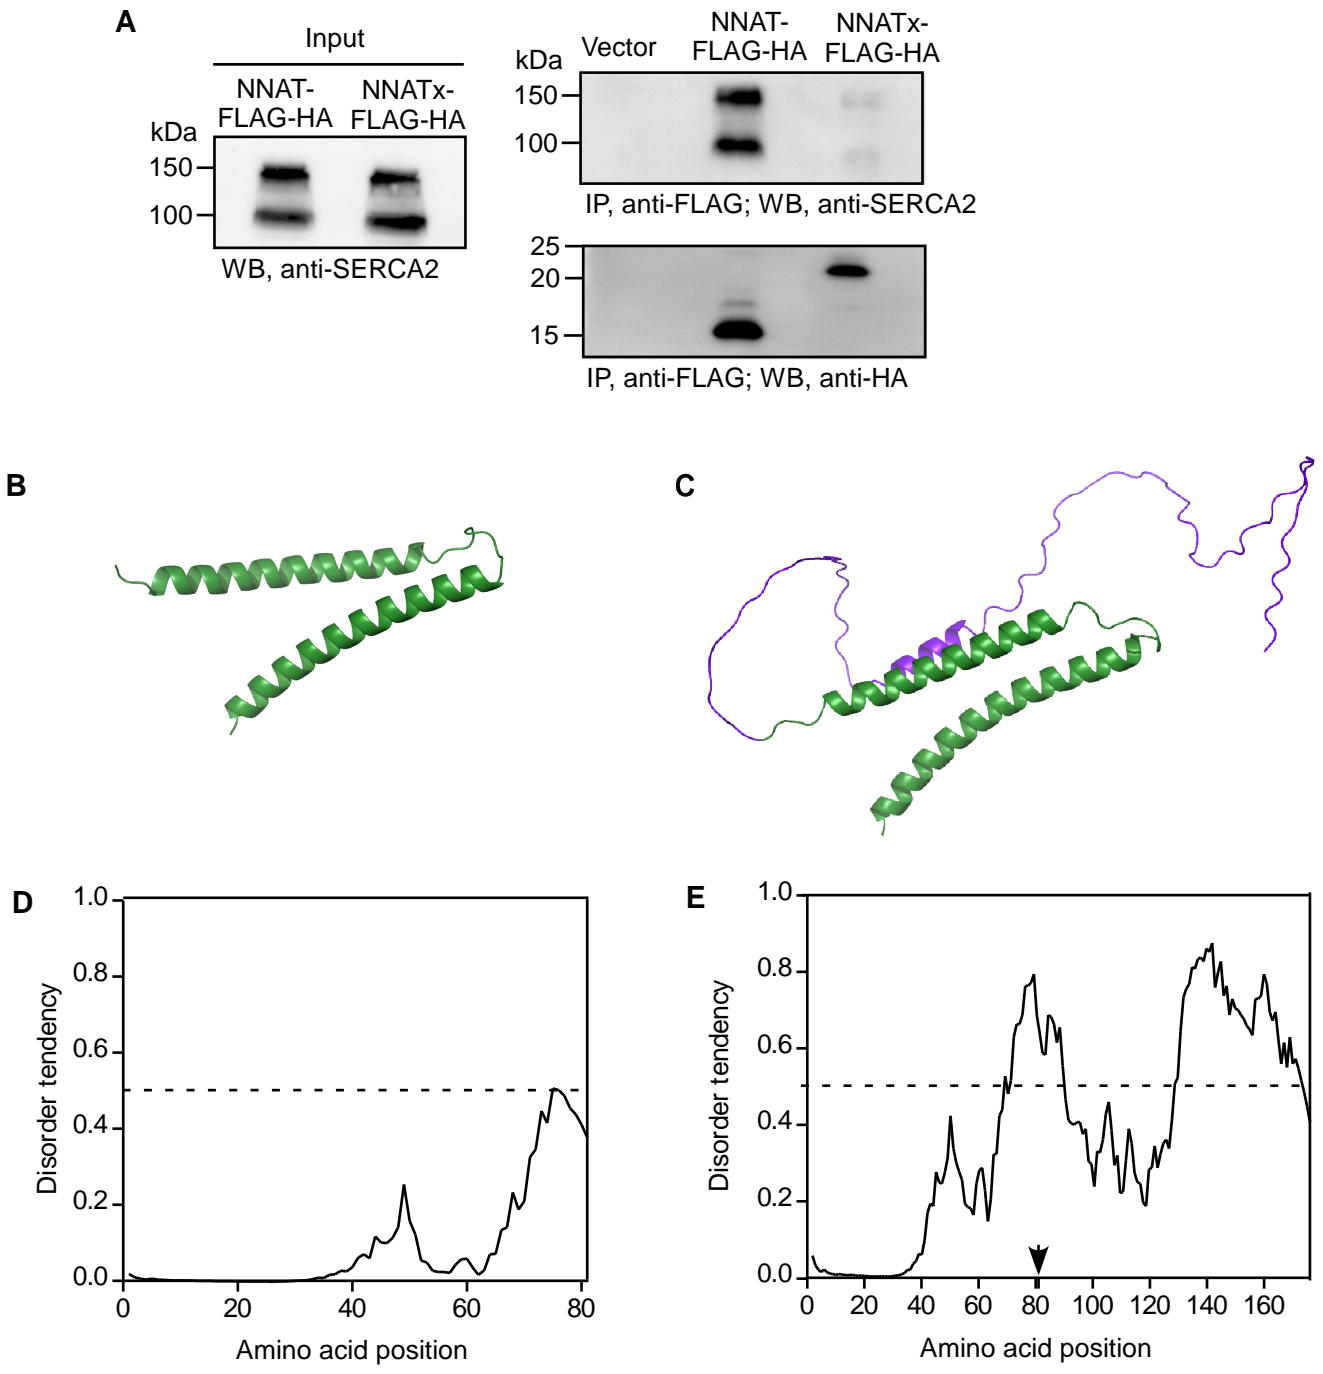

**Figure S7**

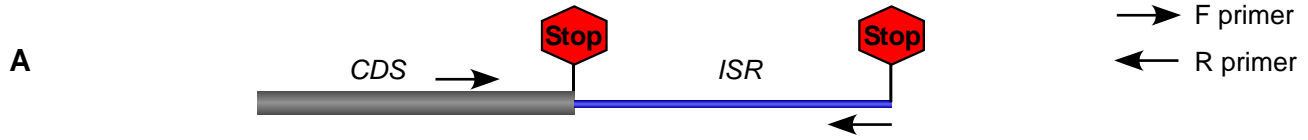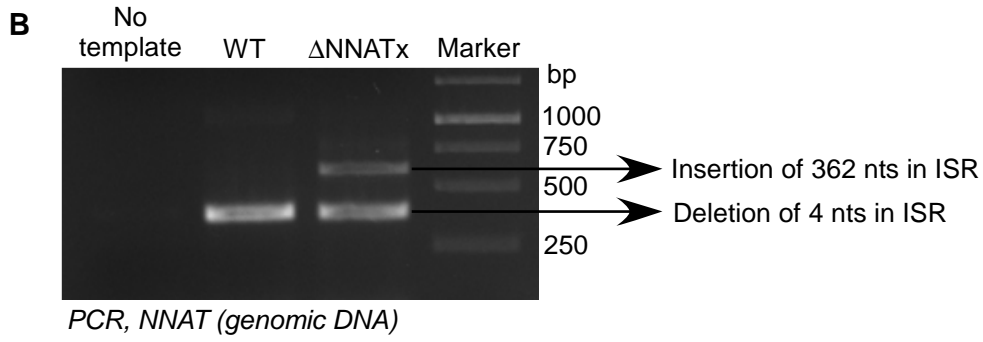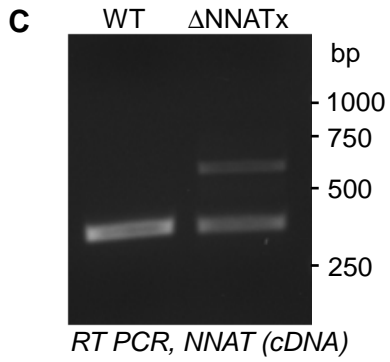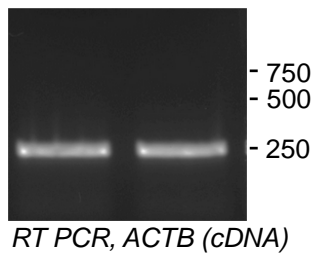

**Figure S8**

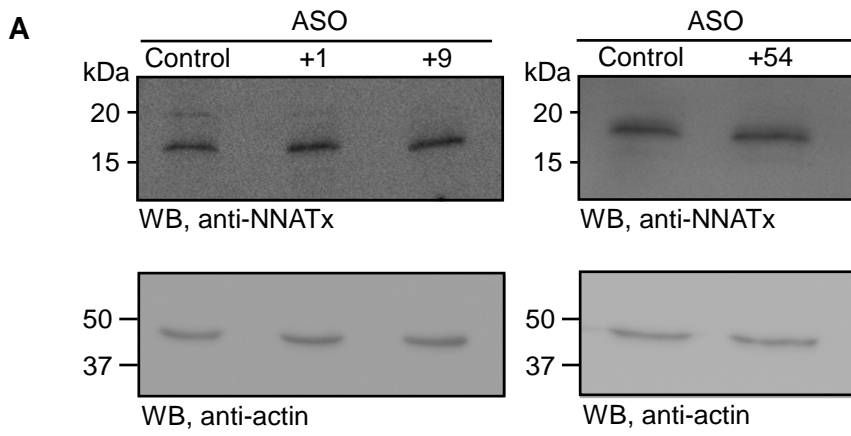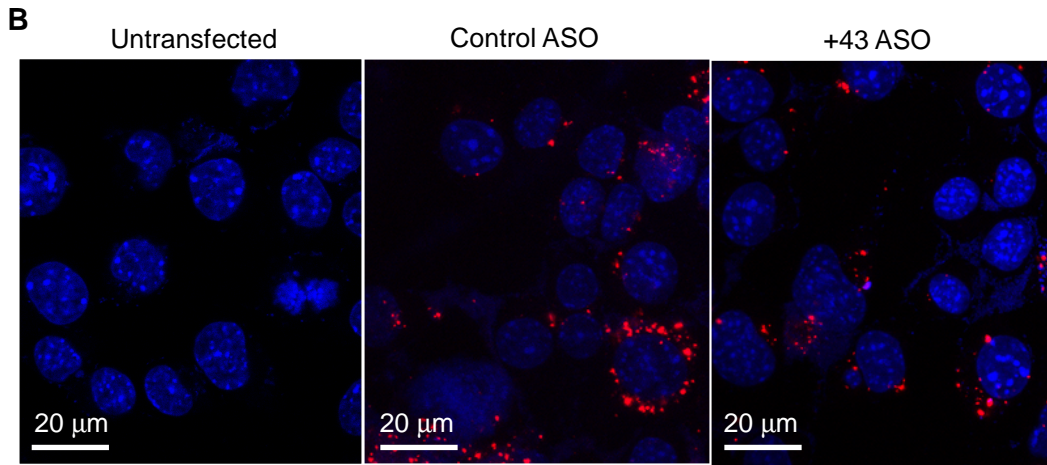

■ DAPI  
■ ASO (Cy3)

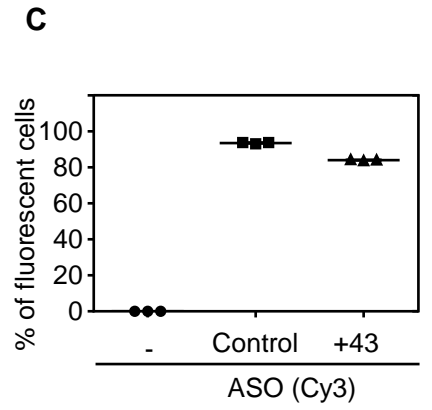

Supplement: mmc1.pdf [file mmc1.pdf]
